# Supplementary material for: Rejuvenation of neutrophils and their extracellular vesicles is associated with enhanced aged fracture healing
Source: PubMed Central journal article supplement (PMC9282841; doi:10.1111/acel.13651), 2022-06-03
Supplement: ACEL-21-e13651-s002.pdf [file ACEL-21-e13651-s002.pdf]

# Parabiosis

*Aged<sup>fx</sup>/Young<sup>intact</sup>*

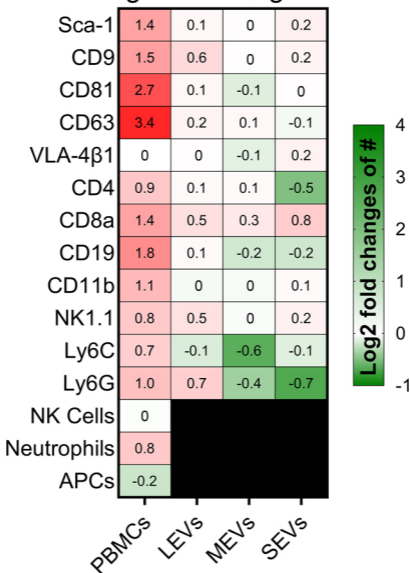

**Supplementary Figure 4 A youthful blood supply led to an enrichment of multiple hematopoietic cells in the parabiosis (PB)-aged<sup>fx</sup> mice.** PBMCs and plasma EVs were separated from heterochronic (young<sup>intact</sup>-aged<sup>fx</sup>, 4 months and 24 months) anastomosed PB mice (n = 4 pairs) on D7 post fracture, and profiled with the indicated surface markers using high resolution multicolor flow cytometry. The heat maps represent a summary of the relative number of PBMCs, LEVs, MEVs or SEVs for each surface marker depicted as the log<sub>2</sub> fold change of PB-aged<sup>fx</sup> / PB-young<sup>intact</sup> mice. A 0 reflects an equal number in the two groups; a positive log<sub>2</sub> fold change reflects a higher number in PB-aged<sup>fx</sup> mice relative to PB-young<sup>intact</sup> mice; a negative log<sub>2</sub> fold change reflects a lower number in in PB-aged<sup>fx</sup> mice relative to PB-young<sup>intact</sup> mice. The log<sub>2</sub> fold changes were indicated as numbers in each cell of the heat maps.
