# Supplementary material for: Rejuvenation of neutrophils and their extracellular vesicles is associated with enhanced aged fracture healing
Source: PubMed Central journal article supplement (PMC9282841; doi:10.1111/acel.13651), 2022-06-03
Supplement: ACEL-21-e13651-s003.pdf [file ACEL-21-e13651-s003.pdf]

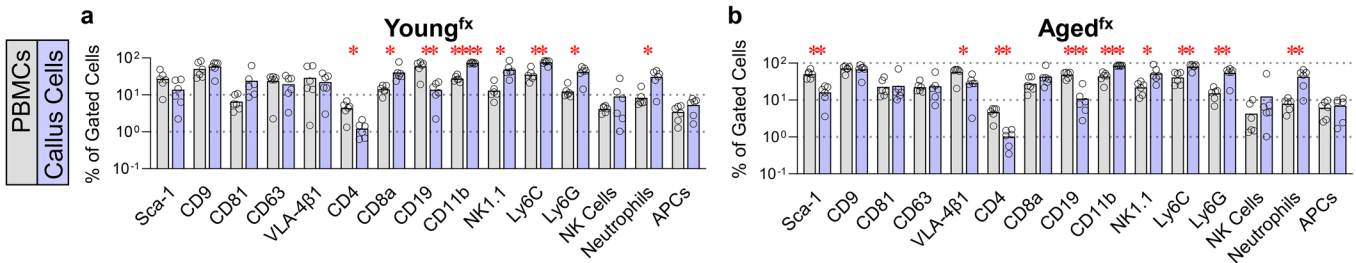

**Supplementary Figure 2 Multiple immune cells were enriched in fracture calluses.** PBMCs and fracture callus cells were harvested from young (age: 4 months) and aged (age: 24 months) mice (n=6 per group) on day 7 post fracture, and profiled with the indicated surface markers using high resolution multicolor flow cytometry. The graphs present a summary of the percentages of cell subsets expressing each surface marker in the matched PBMCs and callus cells of young-fractured (<sup>fx</sup>) (a) and aged<sup>fx</sup> (b) mice. Comparisons between the matched PBMCs and callus cells by paired t test for each marker were performed with results indicated as \* p < 0.05, \*\* p < 0.01, \*\*\* p < 0.001, \*\*\*\* p < 0.0001.
